# Supplementary material
Source: publisher figshare collection journal article supplement (https://sage.figshare.com/ndownloader/files/13158539)
Supplement: Supplementary file 1 [file 13158539]

# Needs Match Rating

Viljoen, Shaffer, Muir, Cochrane, & Brodersen (2018)

“**Substantial strategies**” refers to formal programs (i.e., services) whereas “**some strategies**” refers to less intensive strategies that may be delivered directly by the professional (e.g., talking about triggers).

## Family/Caregivers

**Needs Level** (from Central Eight Risk Rating Tool):

- **Quality of caregiver supervision** (e.g., Do caregivers monitor the youth? Do they set appropriate rules? Do they use appropriate discipline strategies, neither too harsh nor too lenient?)
  - **Quality of relationships with caregivers** (e.g., Does the youth have strong and healthy attachments with caregivers?)
- ☐ No difficulties noted (0)
- ☐ Some or possible difficulties (1)
- ☐ Substantial or definite difficulties (2)

| Case Plan<br>Remember: Substantial strategies focuses on formal services.                                                                                                                                                                                                                                                                                                                                                                                                                                                                                                                                                                            | Interventions Received in 6 Months Following Case Plan                                                                                                                                                                                                                                                                                                                                                                                                                                                                                                                                                                                                                                                               |
|------------------------------------------------------------------------------------------------------------------------------------------------------------------------------------------------------------------------------------------------------------------------------------------------------------------------------------------------------------------------------------------------------------------------------------------------------------------------------------------------------------------------------------------------------------------------------------------------------------------------------------------------------|----------------------------------------------------------------------------------------------------------------------------------------------------------------------------------------------------------------------------------------------------------------------------------------------------------------------------------------------------------------------------------------------------------------------------------------------------------------------------------------------------------------------------------------------------------------------------------------------------------------------------------------------------------------------------------------------------------------------|
| <input type="checkbox"/> No intervention strategies (e.g., no relevant strategies listed, or youth probation officer [YPO] just lists plans to monitor family/ caregivers with no active strategies to change or address family/caregivers) (0)<br><input type="checkbox"/> Some strategies (e.g., YPO plans informal strategies such as <b>meeting with parents to discuss parenting</b> ) (1)<br><input type="checkbox"/> Substantial strategies (e.g., YPO plans services related to improving family relationships/supervision, such as <b>family therapy or parenting group</b> ) (2)<br><input type="checkbox"/> Not applicable – no plan (98) | <input type="checkbox"/> No intervention strategies (e.g., no relevant strategies received, or YPO just monitors family/caregivers with no active strategies to change or address family/caregivers) (0)<br><input type="checkbox"/> Some strategies (e.g., youth/family receives informal strategies – for instance YPO occasionally discusses parenting or youth receives services only rarely, such as a single family therapy session) (1)<br><input type="checkbox"/> Substantial strategies (e.g., youth and/or family regularly participate in services related to improving family relationships/supervision, such as family therapy or parenting group) (2)<br><input type="checkbox"/> Not applicable (98) |
| <i>Rationale for rating (i.e., if you code as possible or substantial, you need to list the strategy/service):</i>                                                                                                                                                                                                                                                                                                                                                                                                                                                                                                                                   | <i>Rationale for rating (i.e., if you code as possible or substantial, you need to list the strategy/service):</i>                                                                                                                                                                                                                                                                                                                                                                                                                                                                                                                                                                                                   |

## Peers

**Needs Level** (from Central Eight Risk Rating Tool):

- **Associations with delinquent peers** (e.g., Are most/all of the youth's friends engaged in delinquency? Or just a few acquaintances?)

- ☐ No difficulties noted (0)
- ☐ Some or possible difficulties (1)
- ☐ Substantial or definite difficulties (2)

| <b>Case Plan</b><br><b>Remember: Substantial strategies focuses on formal services.</b>                                                                                                                                                                                                                                                                                                                                                                                                                                                                                                                                                                          | <b>Interventions Received in 6 Months Following Case Plan</b>                                                                                                                                                                                                                                                                                                                                                                                                                                                                                                                                                                                                                             |
|------------------------------------------------------------------------------------------------------------------------------------------------------------------------------------------------------------------------------------------------------------------------------------------------------------------------------------------------------------------------------------------------------------------------------------------------------------------------------------------------------------------------------------------------------------------------------------------------------------------------------------------------------------------|-------------------------------------------------------------------------------------------------------------------------------------------------------------------------------------------------------------------------------------------------------------------------------------------------------------------------------------------------------------------------------------------------------------------------------------------------------------------------------------------------------------------------------------------------------------------------------------------------------------------------------------------------------------------------------------------|
| <input type="checkbox"/> No intervention strategies (e.g., no relevant strategies listed, or YPO just lists plans to monitor peers with no active strategies to change or address peers) (0)<br><input type="checkbox"/> Some strategies (e.g., YPO plans informal strategies to improve peer associations such as <b>encouraging the youth join a team or spend time with prosocial peers</b> ) (1)<br><input type="checkbox"/> Substantial strategies (e.g., YPO plans services related to improving peer associations, such as <b>supervised after school activities, a mentoring program</b> ) (2)<br><input type="checkbox"/> Not applicable – no plan (98) | <input type="checkbox"/> No intervention strategies (e.g., no relevant strategies received, or YPO just monitors peers with no active strategies to change or address peers) (0)<br><input type="checkbox"/> Some strategies (e.g., youth receives informal strategies such as joining a team, or youth receives services only rarely, such as an occasional after school activity or a single meeting with a mentor) (1)<br><input type="checkbox"/> Substantial strategies (e.g., youth regularly participates in services related to improving peer associations, such as supervised after school activities, a mentoring program) (2)<br><input type="checkbox"/> Not applicable (98) |
| <i>Rationale for rating (i.e., if you code as possible or substantial, you need to list the strategy/service):</i>                                                                                                                                                                                                                                                                                                                                                                                                                                                                                                                                               | <i>Rationale for rating (i.e., if you code as possible or substantial, you need to list the strategy/service):</i>                                                                                                                                                                                                                                                                                                                                                                                                                                                                                                                                                                        |

## Substance Use

**Needs Level** (from Central Eight Risk Rating Tool):

- **Type, frequency, and amount of substance use** (e.g., Does the youth use alcohol, marijuana, hard drugs? How much? How often?)
- **Difficulties related to substance use** (e.g., Has the youth offended or engaged in dangerous activities when drunk or high? Has it affected his or her relationships or education?)

- ☐ No difficulties noted (0)
- ☐ Some or possible difficulties (1)
- ☐ Substantial or definite difficulties (2)

| Case Plan<br>Remember: Substantial strategies focuses on formal services.                                                                                                                                                                                                                                                                                                                                                                                                                                                                                                                                           | Interventions Received in 6 Months Following Case Plan                                                                                                                                                                                                                                                                                                                                                                                                                                                                                                                                                                |
|---------------------------------------------------------------------------------------------------------------------------------------------------------------------------------------------------------------------------------------------------------------------------------------------------------------------------------------------------------------------------------------------------------------------------------------------------------------------------------------------------------------------------------------------------------------------------------------------------------------------|-----------------------------------------------------------------------------------------------------------------------------------------------------------------------------------------------------------------------------------------------------------------------------------------------------------------------------------------------------------------------------------------------------------------------------------------------------------------------------------------------------------------------------------------------------------------------------------------------------------------------|
| <input type="checkbox"/> No intervention strategies (e.g., no relevant strategies listed, or YPO just plans to monitor substance use with no active strategies to change or address substance use) (0)<br><input type="checkbox"/> Some strategies (e.g., YPO plans informal strategies related to substance use such as <b>talking about triggers or consequences</b> of substance use, or <b>informal meetings like AA/NA</b> ) (1)<br><input type="checkbox"/> Substantial strategies (e.g., YPO plans <b>substance abuse treatment/services</b> ) (2)<br><input type="checkbox"/> Not applicable – no plan (98) | <input type="checkbox"/> No intervention strategies (e.g., no relevant strategies received, or YPO just monitors substance use with no active strategies to change or address substance use) (0)<br><input type="checkbox"/> Some strategies (e.g., youth receives informal strategies such as talking with YPO about triggers or consequences of substance use, or youth services only rarely, such as a single AA/NA meeting) (1)<br><input type="checkbox"/> Substantial strategies (e.g., youth regularly participates in substance abuse treatment/services) (2)<br><input type="checkbox"/> Not applicable (98) |
| <i>Rationale for rating (i.e., if you code as possible or substantial, you need to list the strategy/service):</i>                                                                                                                                                                                                                                                                                                                                                                                                                                                                                                  | <i>Rationale for rating (i.e., if you code as possible or substantial, you need to list the strategy/service):</i>                                                                                                                                                                                                                                                                                                                                                                                                                                                                                                    |

## Education/Employment

**Needs Level** (from Central Eight Risk Rating Tool):

- **School achievement** (e.g., Is the youth passing courses? Or does he or she regularly obtain failing grades?)
- **Commitment to school** (e.g., Does youth regularly attend school? Or has he or she dropped out? Is he or she engaged or disruptive?)

- ☐ No difficulties noted (0)
- ☐ Some or possible difficulties (1)
- ☐ Substantial or definite difficulties (2)

| <b>Case Plan</b><br><b>Remember: Substantial strategies focuses on formal services.</b>                                                                                                                                                                                                                                                                                                                                                                                                                                                                                                                                                                                                                                                                                                                                                                                        | <b>Interventions Received in 6 Months Following Case Plan</b>                                                                                                                                                                                                                                                                                                                                                                                                                                                                                                                                                                                                                                                                                                                                                                  |
|--------------------------------------------------------------------------------------------------------------------------------------------------------------------------------------------------------------------------------------------------------------------------------------------------------------------------------------------------------------------------------------------------------------------------------------------------------------------------------------------------------------------------------------------------------------------------------------------------------------------------------------------------------------------------------------------------------------------------------------------------------------------------------------------------------------------------------------------------------------------------------|--------------------------------------------------------------------------------------------------------------------------------------------------------------------------------------------------------------------------------------------------------------------------------------------------------------------------------------------------------------------------------------------------------------------------------------------------------------------------------------------------------------------------------------------------------------------------------------------------------------------------------------------------------------------------------------------------------------------------------------------------------------------------------------------------------------------------------|
| <input type="checkbox"/> No intervention strategies (e.g., no relevant strategies listed, or YPO just plans to monitor education/ employment with no active strategies to change or address education/ employment) (0)<br><input type="checkbox"/> Some strategies (e.g., YPO plans informal strategies related to school, such as <b>encouraging youth to attend school or contacting an alternative school</b> about enrollment) (1)<br><input type="checkbox"/> Substantial strategies (e.g., YPO plans formal services related to increasing school achievement/commitment such as arranging extra school supports, <b>coordinating transport to school, or referring youth to a program that matches youth's interests</b> such as youth attending job training, vocational school, or applying to college) (2)<br><input type="checkbox"/> Not applicable – no plan (98) | <input type="checkbox"/> No intervention strategies (e.g., no relevant strategies received, or YPO just monitors education/employment with no active strategies to change or address education/employment) (0)<br><input type="checkbox"/> Some strategies (e.g., youth receives informal strategies such as being encouraged to attend school, or youth receives services only rarely, such as a single meeting with a tutor) (1)<br><input type="checkbox"/> Substantial strategies (e.g., youth regularly participates in services related to increasing school achievement or commitment such as receiving extra school supports, attending a specialized school program or job training, being provided guidance and assistance in pursuing post-secondary interests) (2)<br><input type="checkbox"/> Not applicable (98) |
| <i>Rationale for rating (i.e., if you code as possible or substantial, you need to list the strategy/service):</i>                                                                                                                                                                                                                                                                                                                                                                                                                                                                                                                                                                                                                                                                                                                                                             | <i>Rationale for rating (i.e., if you code as possible or substantial, you need to list the strategy/service):</i>                                                                                                                                                                                                                                                                                                                                                                                                                                                                                                                                                                                                                                                                                                             |

## Leisure

**Needs Level** (from Central Eight Risk Rating Tool):

- **Involvement in appropriate, organized activities** (e.g., Does he or she spend most time hanging out with friends? Or is he or she involved in sports, clubs, lessons, or other appropriate activities?)
  - ☐ No difficulties noted (0)
  - ☐ Some or possible difficulties (1)
  - ☐ Substantial or definite difficulties (2)

Note: This focuses on leisure or recreational activities outside of work or school. Also, court-mandated treatment should not be coded as leisure.

| <b>Case Plan</b><br><b>Remember: Substantial strategies focuses on formal services.</b>                                                                                                                                                                                                                                                                                                                                                                                                                                                                                                                                                                                                                                                                                                                                  | <b>Interventions Received in 6 Months Following Case Plan</b>                                                                                                                                                                                                                                                                                                                                                                                                                                                                                                                                                                                                                                                                                    |
|--------------------------------------------------------------------------------------------------------------------------------------------------------------------------------------------------------------------------------------------------------------------------------------------------------------------------------------------------------------------------------------------------------------------------------------------------------------------------------------------------------------------------------------------------------------------------------------------------------------------------------------------------------------------------------------------------------------------------------------------------------------------------------------------------------------------------|--------------------------------------------------------------------------------------------------------------------------------------------------------------------------------------------------------------------------------------------------------------------------------------------------------------------------------------------------------------------------------------------------------------------------------------------------------------------------------------------------------------------------------------------------------------------------------------------------------------------------------------------------------------------------------------------------------------------------------------------------|
| <input type="checkbox"/> No intervention strategies (e.g., no relevant strategies listed, or YPO just plans to monitor leisure time with no active strategies to change or address leisure time) (0)<br><input type="checkbox"/> Some strategies (e.g., YPO plans informal strategies to improve leisure such as encouraging the youth to <b>join a team, or engage in hobbies such as music lessons</b> ) (1)<br><input type="checkbox"/> Substantial strategies (e.g., YPO plans to actively facilitate strategies/services related to improving leisure, such as helping youth to sign up for <b>supervised extracurricular activities, or referring youth to an intensive support and supervision program</b> [ISSP] that includes a focus on leisure) (2)<br><input type="checkbox"/> Not applicable – no plan (98) | <input type="checkbox"/> No intervention strategies (e.g., no relevant strategies received, or YPO just monitors leisure time with no active strategies to change or address leisure time) (0)<br><input type="checkbox"/> Some strategies (e.g., youth receives informal strategies to improve leisure such as being encouraged to join a team or engage in hobbies, or youth receives services only rarely, such as occasional participation in ISSP) (1)<br><input type="checkbox"/> Substantial strategies (e.g., youth regularly participates in services related to improving leisure, such as supervised after school activities or an ISSP program that includes a focus on leisure) (2)<br><input type="checkbox"/> Not applicable (98) |
| <i>Rationale for rating (i.e., if you code as possible or substantial, you need to list the strategy/service):</i>                                                                                                                                                                                                                                                                                                                                                                                                                                                                                                                                                                                                                                                                                                       | <i>Rationale for rating (i.e., if you code as possible or substantial, you need to list the strategy/service):</i>                                                                                                                                                                                                                                                                                                                                                                                                                                                                                                                                                                                                                               |

## Antisocial Personality Pattern

**Needs Level** (from Central Eight Risk Rating Tool):

- **Self-control** (e.g., Is the youth impulsive? Restless? Pleasure or sensation-seeking? Do they have attentional deficits?)
- **Negative emotionality** (e.g., Does he or she become frustrated easily? Aggressive? Irritable? Lacking in remorse?)

- ☐ No difficulties noted (0)
- ☐ Some or possible difficulties (1)
- ☐ Substantial or definite difficulties (2)

| <p style="text-align: center;"><b>Case Plan</b></p> <p style="text-align: center;"><b>Remember: Substantial strategies focuses on formal services.</b></p>                                                                                                                                                                                                                                                                                                                                                                                                                                                                                                                                                                                                                                                                                                                                                                                                                                      | <p style="text-align: center;"><b>Interventions Received in 6 Months Following Case Plan</b></p>                                                                                                                                                                                                                                                                                                                                                                                                                                                                                                                                                                                                                                                                                                                                                                                                                                                                                   |
|-------------------------------------------------------------------------------------------------------------------------------------------------------------------------------------------------------------------------------------------------------------------------------------------------------------------------------------------------------------------------------------------------------------------------------------------------------------------------------------------------------------------------------------------------------------------------------------------------------------------------------------------------------------------------------------------------------------------------------------------------------------------------------------------------------------------------------------------------------------------------------------------------------------------------------------------------------------------------------------------------|------------------------------------------------------------------------------------------------------------------------------------------------------------------------------------------------------------------------------------------------------------------------------------------------------------------------------------------------------------------------------------------------------------------------------------------------------------------------------------------------------------------------------------------------------------------------------------------------------------------------------------------------------------------------------------------------------------------------------------------------------------------------------------------------------------------------------------------------------------------------------------------------------------------------------------------------------------------------------------|
| <p><input type="checkbox"/> No intervention strategies (e.g., no relevant strategies listed, or YPO just plans to monitor personality features such as self-control/negative emotionality with no active strategies to change or address this) (0)</p> <p><input type="checkbox"/> Some strategies (e.g., YPO plans informal strategies to improve self-control/negative emotionality such as <b>talking with youth about triggers, or consequences of actions, or setting up rules</b>) (1)</p> <p style="padding-left: 20px;"><input type="checkbox"/> OR refers youth to “therapy” or “counseling” but it is not clear if this focuses on antisocial personality</p> <p><input type="checkbox"/> Substantial strategies (e.g., YPO plans services related to improving self-control/negative emotionality, such as <b>anger management therapy, violent offender treatment program, or medication for impulsivity</b>) (2)</p> <p><input type="checkbox"/> Not applicable – no plan (98)</p> | <p><input type="checkbox"/> No intervention strategies (e.g., no relevant strategies received, or YPO just monitors personality features such as self-control/negative emotionality with no active strategies to change or address this) (0)</p> <p><input type="checkbox"/> Some strategies (e.g., youth receives informal strategies such as talking with YPO about triggers for anger, or youth receives services only rarely, such as a single session of therapy) (1)</p> <p style="padding-left: 20px;"><input type="checkbox"/> OR youth attends “therapy” or “counseling” but it is not clear that this focuses on antisocial personality</p> <p><input type="checkbox"/> Substantial strategies (e.g., youth regularly participates in services related to improving self-control/negative emotionality, such as anger management therapy, violent offender treatment program, or medication for impulsivity) (2)</p> <p><input type="checkbox"/> Not applicable (98)</p> |
| <p><i>Rationale for rating (i.e., if you code as possible or substantial, you need to list the strategy/service):</i></p>                                                                                                                                                                                                                                                                                                                                                                                                                                                                                                                                                                                                                                                                                                                                                                                                                                                                       | <p><i>Rationale for rating (i.e., if you code as possible or substantial, you need to list the strategy/service):</i></p>                                                                                                                                                                                                                                                                                                                                                                                                                                                                                                                                                                                                                                                                                                                                                                                                                                                          |

## Procriminal Attitudes

**Needs Level** (from Central Eight Risk Rating Tool):

- **Attitudes supportive of crime** (e.g., Does he or she believe that it is acceptable to commit crimes and engage in violence? Does he or she have negative attitudes towards the law? Does she or he have hostile world views?)
  - ☐ No difficulties noted (0)
  - ☐ Some or possible difficulties (1)
  - ☐ Substantial or definite difficulties (2)

Note: If a youth is referred to therapy, but there is no evidence that the youth actually received it, then this should be coded as no intervention strategies received.

| <b>Case Plan</b><br><b>Remember: Substantial strategies focuses on formal services.</b>                                                                                                                                                                                                                                                                                                                                                                                                                                                                                                                                                                                                                                                                                                                                                                                                        | <b>Interventions Received in 6 Months Following Case Plan</b>                                                                                                                                                                                                                                                                                                                                                                                                                                                                                                                                                                                                                                                                                                                                                                                                                                                                  |
|------------------------------------------------------------------------------------------------------------------------------------------------------------------------------------------------------------------------------------------------------------------------------------------------------------------------------------------------------------------------------------------------------------------------------------------------------------------------------------------------------------------------------------------------------------------------------------------------------------------------------------------------------------------------------------------------------------------------------------------------------------------------------------------------------------------------------------------------------------------------------------------------|--------------------------------------------------------------------------------------------------------------------------------------------------------------------------------------------------------------------------------------------------------------------------------------------------------------------------------------------------------------------------------------------------------------------------------------------------------------------------------------------------------------------------------------------------------------------------------------------------------------------------------------------------------------------------------------------------------------------------------------------------------------------------------------------------------------------------------------------------------------------------------------------------------------------------------|
| <input type="checkbox"/> No intervention strategies (e.g., no relevant strategies listed, or YPO just plans to monitor attitudes with no active strategies to change or address attitudes) (0)<br><input type="checkbox"/> Some strategies (e.g., YPO plans informal strategies related to procriminal attitudes such as <b>discussing/challenging antisocial thinking</b> ) (1) <ul style="list-style-type: none"> <li><input type="checkbox"/> OR refers youth to “therapy” or “counseling” but it is not clear if this focuses on procriminal attitudes</li> </ul> <input type="checkbox"/> Substantial strategies (e.g., YPO plans services related to procriminal attitudes, such as a cognitive-behavioral violent offender treatment program or another form of <b>therapy that is addressing procriminal attitudes</b> ) (2)<br><input type="checkbox"/> Not applicable – no plan (98) | <input type="checkbox"/> No intervention strategies (e.g., no relevant strategies received, or YPO just monitors attitudes with no active strategies to change or address attitudes) (0)<br><input type="checkbox"/> Some strategies (e.g., youth receives informal strategies such as YPO discussing/challenging antisocial thinking, or receives services only rarely, such as a single therapy session) (1) <ul style="list-style-type: none"> <li><input type="checkbox"/> OR youth attends “therapy” or “counseling” but it is not clear if this focuses on procriminal attitudes</li> </ul> <input type="checkbox"/> Substantial strategies (e.g., youth regularly participants in services related to procriminal attitudes, such as a cognitive-behavioral violent offender treatment program or another form of therapy that is addressing procriminal attitudes) (2)<br><input type="checkbox"/> Not applicable (98) |
| <i>Rationale for rating (i.e., if you code as possible or substantial, you need to list the strategy/service):</i>                                                                                                                                                                                                                                                                                                                                                                                                                                                                                                                                                                                                                                                                                                                                                                             | <i>Rationale for rating (i.e., if you code as possible or substantial, you need to list the strategy/service):</i>                                                                                                                                                                                                                                                                                                                                                                                                                                                                                                                                                                                                                                                                                                                                                                                                             |
